# Supplementary material for: Impact of changes in mode of travel to work on changes in body mass index: evidence from the British Household Panel Survey
Source: HighWire-hosted journal article supplement (doi:10.1136/jech-2014-205211), 2015-05-07
Supplement: jech-2014-205211supp_appendix.pdf [file jech-2014-205211supp_appendix.pdf]

**Appendix: An assessment of missing values and attrition bias**

The table shows descriptive statistics and group comparisons for samples of participants before and after a sample restriction was imposed. The test for missing values compared participants who remained in the sample (n=7,471) with those excluded because they did not report BMI at t0 (n=339). The test for attrition bias compared individuals who remained in the sample (n=6,634) with those excluded from the analysis because they were no longer in the dataset at t2 (n=837). The results show significant differences in the characteristics of individuals (e.g. in terms of age, gender, income and BMI) between groups, indicating that attrition and missing values are likely to be a source of bias in the results.

| Characteristic (at t0)                                  | Test for missing values (height and weight data) bias (See [a] in Figure 1) |                                                              |                  | Test for attrition bias (See [b] in Figure 1) |                                                                          |                  |
|---------------------------------------------------------|-----------------------------------------------------------------------------|--------------------------------------------------------------|------------------|-----------------------------------------------|--------------------------------------------------------------------------|------------------|
|                                                         | % or mean                                                                   |                                                              | p <sup>b</sup>   | % or mean                                     |                                                                          | p <sup>b</sup>   |
|                                                         | Participants retained in the sample                                         | Participants excluded from analysis due to missing BMI at t0 |                  | Participants retained in the sample           | Participants excluded from analysis due to leaving the dataset before t2 |                  |
| n <sup>a</sup>                                          | 7,471                                                                       | 339                                                          |                  | 6,634                                         | 837                                                                      |                  |
| Age (mean years)                                        | 39.6                                                                        | 37.2**                                                       | <b>0.001</b>     | 35.6                                          | 40.1                                                                     | <b>&lt;0.001</b> |
| Male <sup>c</sup>                                       | 50.4                                                                        | 19.8***                                                      | <b>&lt;0.001</b> | 52.1                                          | 50.2                                                                     | 0.298            |
| Professional or managerial occupation <sup>c</sup>      | 39.2                                                                        | 33.9                                                         | 0.052            | 37.5                                          | 39.4                                                                     | 0.296            |
| Full time work <sup>c</sup>                             | 78.0                                                                        | 66.7***                                                      | <b>&lt;0.001</b> | 79.9                                          | 77.8                                                                     | 0.152            |
| Works at night time <sup>c</sup>                        | 2.1                                                                         | 2.9                                                          | 0.319            | 2.3                                           | 2.1                                                                      | 0.785            |
| Household income (mean £s)                              | 31,126.8                                                                    | 29,021.5*                                                    | <b>0.011</b>     | 29,417.9                                      | 31,342.4                                                                 | 0.008            |
| Education: Degree or higher qualification <sup>c</sup>  | 19.2                                                                        | 13.6**                                                       | <b>0.009</b>     | 20.0                                          | 19.1                                                                     | 0.576            |
| One or more children in the household <sup>c</sup>      | 19.6                                                                        | 30.7***                                                      | <b>&lt;0.001</b> | 14.1                                          | 20.3                                                                     | <b>&lt;0.001</b> |
| Lives in London or South-East England <sup>c</sup>      | 13.9                                                                        | 13.3                                                         | 0.737            | 16.1                                          | 13.6                                                                     | 0.050            |
| BMI (mean kg/m <sup>2</sup> )                           | n/a                                                                         | n/a                                                          | n/a              | 25.2                                          | 26.0                                                                     | <b>&gt;0.001</b> |
| WHO-classified overweight <sup>c</sup>                  | n/a                                                                         | n/a                                                          | n/a              | 47.2                                          | 52.9                                                                     | <b>0.002</b>     |
| 'Poor' or 'very poor' self-assessed health <sup>c</sup> | 4.8                                                                         | 6.8                                                          | 0.091            | 5.0                                           | 4.7                                                                      | 0.716            |
| Self-reported smoker <sup>c</sup>                       | 25.9                                                                        | 23.3                                                         | 0.278            | 31.7                                          | 25.2                                                                     | <b>&lt;0.001</b> |
| More than 3 annual hospital visits <sup>a c</sup>       | 11.4                                                                        | 15.1*                                                        | <b>0.039</b>     | 10.3                                          | 11.6                                                                     | 0.268            |
| More than 6 annual primary care visits <sup>a c</sup>   | 10.7                                                                        | 13.3                                                         | 0.130            | 10.0                                          | 10.8                                                                     | 0.510            |
| One or more cars in household <sup>c</sup>              | 91.2                                                                        | 86.1**                                                       | <b>0.001</b>     | 88.1                                          | 91.6                                                                     | <b>0.001</b>     |
| Number of cars in household (mean)                      | 1.6                                                                         | 1.5                                                          | 0.122            | 1.5                                           | 1.6                                                                      | 0.005            |
| Commute time (mean minutes) <sup>a</sup>                | 23.8                                                                        | 20.4**                                                       | <b>0.002</b>     | 24.8                                          | 23.7                                                                     | <b>0.031</b>     |
| At least weekly LTPA <sup>a c</sup>                     | 59.0                                                                        | 52.8*                                                        | <b>0.023</b>     | 58.5                                          | 59.1                                                                     | 0.735            |
| At least weekly gardening <sup>a c</sup>                | 22.4                                                                        | 16.8*                                                        | <b>0.015</b>     | 15.1                                          | 23.3                                                                     | <b>&lt;0.001</b> |
| At least weekly eating out <sup>a c</sup>               | 18.3                                                                        | 15.3                                                         | 0.172            | 21.3                                          | 17.9                                                                     | <b>0.016</b>     |

\*  $p < 0.05$ , \*\*  $p < 0.01$ , \*\*\*  $p < 0.001$

<sup>a</sup> Sample sizes used in a small number of cases was less than shown since values were not reported for some variables for all individuals.

<sup>b</sup> The results of Chi-squared tests (or Mann-Whitney tests for number of cars, age, income and commute time, or student's t-tests for BMI), where the null hypothesis was that the difference between the two groups was equal to zero.

<sup>c</sup> Binary variables were created as described in Table 2.
